# Supplementary material for: The RBG-1–RBG-2 complex modulates autophagy activity by regulating lysosomal biogenesis and function in C. elegans
Source: Oxford University Press journal article supplement (doi:10.1242/jcs.234195), 2019-08-23
Supplement: jcs234195supp.pdf [file jcs234195supp.pdf]

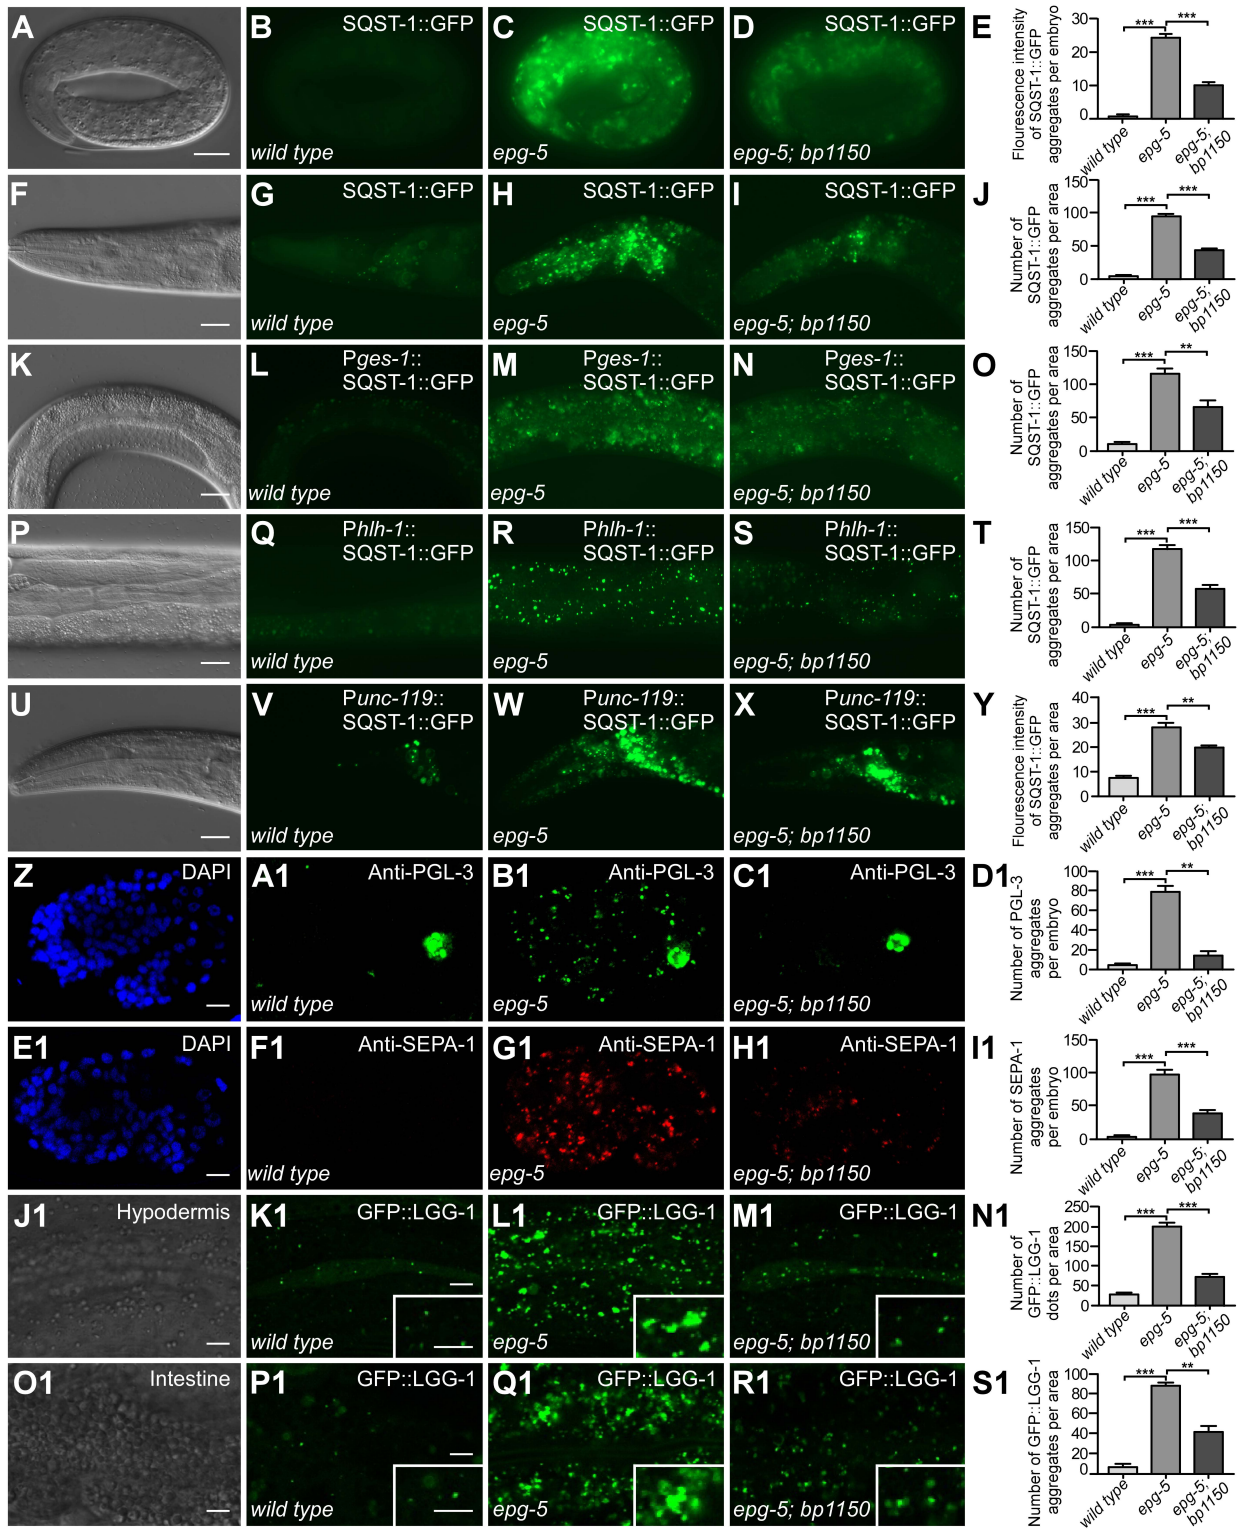

Figure S1

**Figure S1. *bp1150* suppresses the autophagy defect in *epg-5* mutants.**

(A-E) SQST-1::GFP is weakly expressed and diffusely localized in wild-type embryos

(B). (A) shows the differential interference contrast (DIC) image of the embryo in

(B). SQST-1::GFP accumulates into a large number of aggregates in *epg-5*

mutants (C). In *epg-5; bp1150* double mutants, the accumulation of SQST-1::GFP

is weaker than in *epg-5* animals (D). 4-fold stage embryos are shown in (A-D). (E)

shows quantification of the fluorescence intensity of SQST-1::GFP in wild-type,

*epg-5* and *epg-5; bp1150* embryos. Data are shown as mean  $\pm$  S.E.M. (n=7).

\*\*\*p<0.001. Scale bar: 10  $\mu$ m (A-D).

(F-J) SQST-1::GFP forms only a few small aggregates in the head region in wild-type

animals (G). (F) shows the DIC image of the animal in (G). A large number of

SQST-1::GFP aggregates accumulate in *epg-5* mutants (H). In *epg-5; bp1150*

double mutants, the number of SQST-1::GFP aggregates is less than in *epg-5*

animals (I). Quantification of the number of SQST-1 in wild type, *epg-5* mutants

and *epg-5; bp1150* mutants is shown as mean  $\pm$  S.E.M. (n=8) in (J). “Area” used

for quantification refers to the captured image. \*\*\*p<0.001. Scale bar: 20  $\mu$ m

(F-I).

(K-O) In wild-type animals, SQST-1::GFP does not accumulate when expressed

specifically in intestine (L). (K) shows the DIC image of the animal in (L). In

*epg-5* mutants, SQST-1::GFP accumulates into numerous aggregates (M) and the

number is dramatically reduced by the *bp1150* mutation (N). The faint GFP

puncta in the background are intestinal autofluorescence (N). Quantification of the number of SQST-1::GFP puncta in wild type, *epg-5* mutants and *epg-5; bp1150* mutants is shown as mean  $\pm$  S.E.M. (n=5) in (O). \*\*p<0.01, \*\*\*p<0.001. Scale bar: 20  $\mu$ m (K-N).

(P-T) In wild-type animals, SQST-1::GFP forms a few small aggregates when specifically expressed in muscle (Q). (P) shows the DIC image of the animal in (Q). Numerous SQST-1::GFP aggregates accumulate in *epg-5* mutants (R). In *epg-5; bp1150* double mutants, the number of SQST-1::GFP dots is much less than in *epg-5* animals (S). Quantification of the number of SQST-1::GFP aggregates in wild type, *epg-5* mutants and *epg-5; bp1150* mutants is shown as mean  $\pm$  S.E.M. (n=8) in (T). \*\*\*p<0.001. Scale bar: 20  $\mu$ m (P-S).

(U-Y) SQST-1::GFP driven by the neuronal-specific promoter *unc-119* forms a few aggregates in the head region in wild-type animals (V). (U) is the DIC image of the animal shown in (V). In *epg-5* mutants, SQST-1::GFP accumulates into a large number of aggregates (W), and this is ameliorated by *bp1150* (X). (Y) shows quantification of the fluorescence intensity of SQST-1::GFP in wild type, *epg-5* mutants and *epg-5; bp1150* mutants. Data are shown as mean  $\pm$  S.E.M. (n=5). \*\*p<0.01, \*\*\*p<0.001. Scale bar: 20  $\mu$ m (U-X).

(Z-D1) PGL granules, detected by anti-PGL-3 antibody (diluted 1:1000), are absent in somatic cells in wild-type embryos at the comma stage (A1). PGL-3-labeled granules are present in germline precursor cells Z2 and Z3. (Z) shows the DAPI image of the embryo in (A1). PGL-3 granules dramatically accumulate in somatic

cells in *epg-5* mutant embryos (B1). Accumulation of PGL granules is suppressed in *epg-5; bp1150* embryos (C1). Quantification of the number of PGL granules in somatic cells in wild type, *epg-5* mutants and *epg-5; bp1150* mutants is shown as mean  $\pm$  S.E.M. (n=3) in (D1). \*\*p<0.01, \*\*\*p<0.001. Scale bar: 5  $\mu$ m (Z-C1).

(E1-I1) SEPA-1 aggregates, detected by anti-SEPA-1 antibody (diluted 1:10000), are absent in comma stage wild-type embryos (F1). (E1) shows the DAPI image of the embryo in (F1). A large number of SEPA-1 aggregates accumulate in *epg-5* mutant embryos at the comma stage (G1), and this is dramatically suppressed in *epg-5; bp1150* embryos (H1). Quantification of the number of SEPA-1 aggregates in wild type, *epg-5* mutants and *epg-5; bp1150* mutants is shown as mean  $\pm$  S.E.M. (n=4) in (I1). \*\*\*p<0.001. Scale bar: 5  $\mu$ m (E1-H1).

(J1-N1) Expression of GFP::LGG-1 in the hypodermis of wild-type, *epg-5* and *epg-5; bp1150* animals. In wild-type hypodermis, GFP::LGG-1 is weakly expressed and forms a few small puncta (K1). (J1) shows the DIC image of the animal in (K1). A large number of GFP::LGG-1 puncta accumulate in *epg-5* mutants (L1) and the number is decreased in *epg-5; bp1150* double mutants (M1). Quantification of the number of GFP::LGG-1 in wild type, *epg-5* mutants and *epg-5; bp1150* mutants is shown as mean  $\pm$  S.E.M. (n=5) in (N1). \*\*\*p<0.001. Scale bar: 5  $\mu$ m (J1-M1).

(O1-S1) Expression of GFP::LGG-1 in wild-type, *epg-5* and *epg-5; bp1150* intestine. In wild-type intestine, GFP::LGG-1 is weakly expressed and forms a few small puncta (P1). (O1) shows the DIC image of the animal in (P1). Numerous GFP::LGG-1 puncta accumulate in *epg-5* mutant intestine (Q1). The number of

GFP::LGG-1 puncta is decreased in *epg-5; bp1150* double mutants (R1).

Quantification of the number of GFP::LGG-1 in wild type, *epg-5* mutants and *epg-5; bp1150* mutants is shown as mean  $\pm$  S.E.M. (n=5) in (S1). \*\*p<0.01, \*\*\*p<0.001. Scale bar: 5  $\mu$ m (O1-R1).

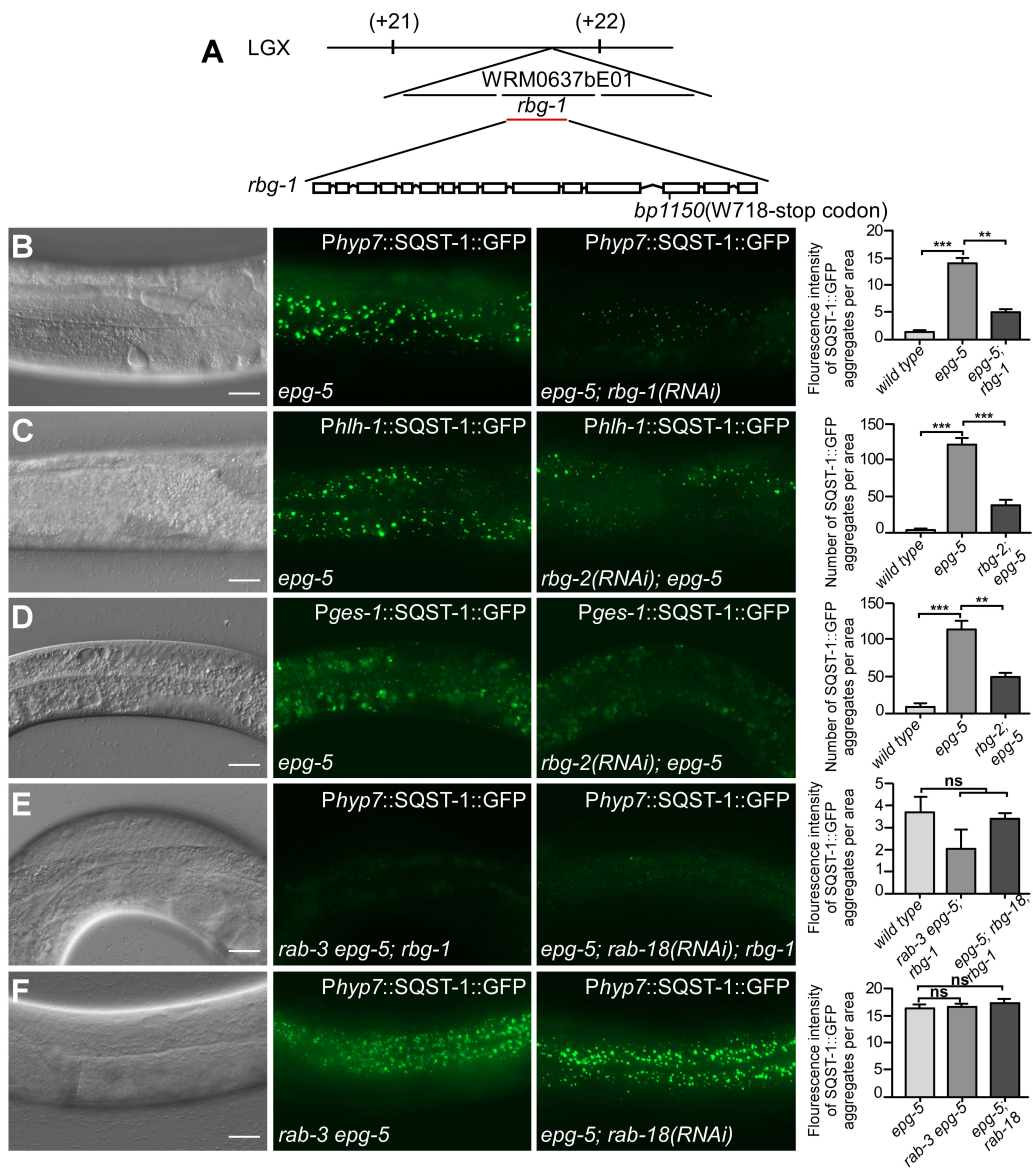

Figure S2

**Figure S2. The RBG-1/RBG-2 complex modulates degradation of SQST-1 aggregates in *epg-5* mutants in a manner independent of RAB-3 and RAB-18.**

(A) A transgene expressing *rbg-1* rescues the phenotype in *bp1150* mutants. *bp1150* contains a tryptophan to stop codon mutation at residue 718 in RBG-1.

(B) *rbg-1(RNAi)* suppresses the accumulation of SQST-1::GFP aggregates in *epg-5* mutants. SQST-1::GFP is specifically expressed in the hypodermis.

Quantification of the fluorescence intensity of SQST-1::GFP in various genetic backgrounds is shown as mean  $\pm$  S.E.M. (n=8). \*\*p<0.01, \*\*\*p<0.001.

(C,D) Accumulation of SQST-1::GFP aggregates in *epg-5* muscles (C) and the intestine (D) is suppressed by simultaneous depletion of *rbg-2*. SQST-1::GFP is driven by a tissue-specific promoter. The faint GFP puncta in the background are intestinal autofluorescence (D). Quantification of the number of SQST-1::GFP aggregates in various genetic backgrounds is shown as mean  $\pm$  S.E.M. (n=6).

\*\*p<0.01, \*\*\*p<0.001.

(E) Loss of function of *rab-3* and *rab-18* fail to restore the accumulation of SQST-1::GFP aggregates in the *epg-5; rbg-1* hypodermis. Quantification of the fluorescence intensity of SQST-1::GFP in various genetic backgrounds is shown as mean  $\pm$  S.E.M. (n=6). ns: no significant difference.

(F) Loss of function of *rab-3* and *rab-18* fail to suppress the accumulation of SQST-1::GFP aggregates in *epg-5* hypodermal cells. Quantification of the fluorescence intensity of SQST-1::GFP in various genetic backgrounds is shown as mean  $\pm$  S.E.M. (n=5). ns: no significant difference. Scale bar: 20  $\mu$ m (B-F).

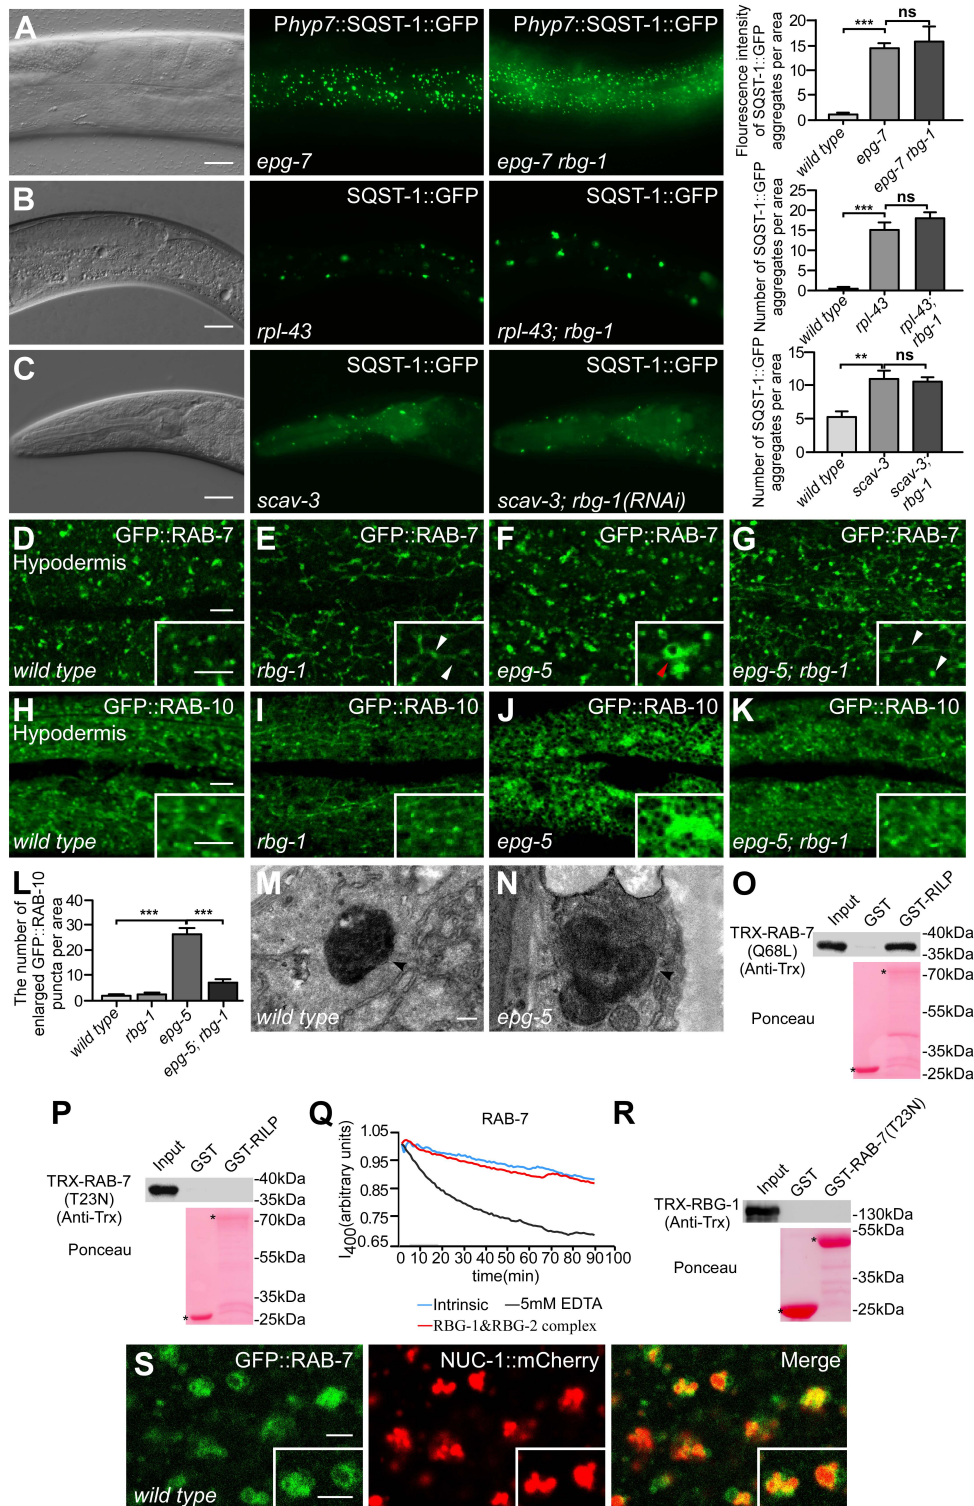

Figure S3



**Figure S3. Loss of *rbg-1* activity suppresses the autophagy defect in *epg-5* mutants but does not generally elevate autophagy activity.**

- (A) In *epg-7* hypodermis, a large number of SQST-1::GFP aggregates accumulate, and this is slightly increased by loss of function of *rbg-1*, although the change is not statistically significant. Quantification of the fluorescence intensity of SQST-1::GFP in various genetic backgrounds is shown as mean  $\pm$  S.E.M. (n=5). \*\*\*p<0.001, ns: no significant difference. Scale bar: 20  $\mu$ m (A).
- (B) In *rpl-43* intestine, SQST-1::GFP accumulates into large aggregates, and this can be suppressed by elevating autophagy activity (Guo et al., 2014), but not by simultaneous loss of function of *rbg-1*. Quantification of the number of SQST-1::GFP aggregates in the indicated genetic backgrounds is shown as mean  $\pm$  S.E.M. (n=5). \*\*\*p<0.001, ns: no significant difference. Scale bar: 20  $\mu$ m (B).
- (C) A few SQST-1::GFP aggregates accumulate in *scav-3* mutants, and this is not affected by loss of *rbg-1* activity. Quantification of the number of SQST-1::GFP aggregates in the indicated genetic backgrounds is shown as mean  $\pm$  S.E.M. (n=6). \*\*p<0.01. ns: no significant difference. Scale bar: 20  $\mu$ m (C).
- (D-G) GFP::RAB-7 labels spherical structures and a few tubular structures in wild-type animals (D). *rbg-1* mutants contain more GFP::RAB-7-labeled small spherical structures and tubular structures than wild-type worms (E). GFP::RAB-7 labels enlarged ring-like structures and shows no tubular structures in *epg-5* mutants (F). In *epg-5; rbg-1* double mutants, the abnormally enlarged

- GFP::RAB-7-labeled structures are suppressed (G). White arrowheads indicate the small spherical and tubular structures. Red arrowhead indicates the abnormal ring-like structure in *epg-5* mutants. Scale bar: 5  $\mu$ m (D-G).
- (H-K) GFP::RAB-10 forms small dots in the hypodermis in wild-type (H) and *rbg-1* animals (I), while it forms abnormally big puncta in *epg-5* mutants (J). The formation of enlarged GFP::RAB-10 puncta is suppressed in *epg-5; rbg-1* double mutants (K). Scale bar: 5  $\mu$ m (H-K).
- (L) Quantification of enlarged GFP::RAB-10 puncta in wild-type, *rbg-1*, *epg-5* and *epg-5; rbg-1* animals. Data are shown as mean  $\pm$  S.E.M. (n=5). \*\*\*p<0.001.
- (M,N) Electron microscopy analysis reveals that compared to wild-type animals, *epg-5* mutants contain enlarged lysosomal structures with abnormal appearance. Arrowheads indicate the lysosomal structures. Scale bar: 200 nm (M,N).
- (O) In an *in vitro* GST pulldown assay, TRX-RAB-7(Q68L) is specifically pulled down by GST-RILP.
- (P) In an *in vitro* GST pulldown assay, TRX-RAB-7(T23N) fails to be pulled down by GST-RILP.
- (Q) The RBG-1/RBG-2 complex does not possess evident GEF activity towards RAB-7.
- (R) In an *in vitro* GST pulldown assay, TRX-RBG-1 fails to be pulled down by GST-RAB-7(T23N).
- (S) GFP::RAB-7 forms ring-like structures that enclose the lysosomal-localized DNase II NUC-1::mCherry. Scale bar: 0.25  $\mu$ m.

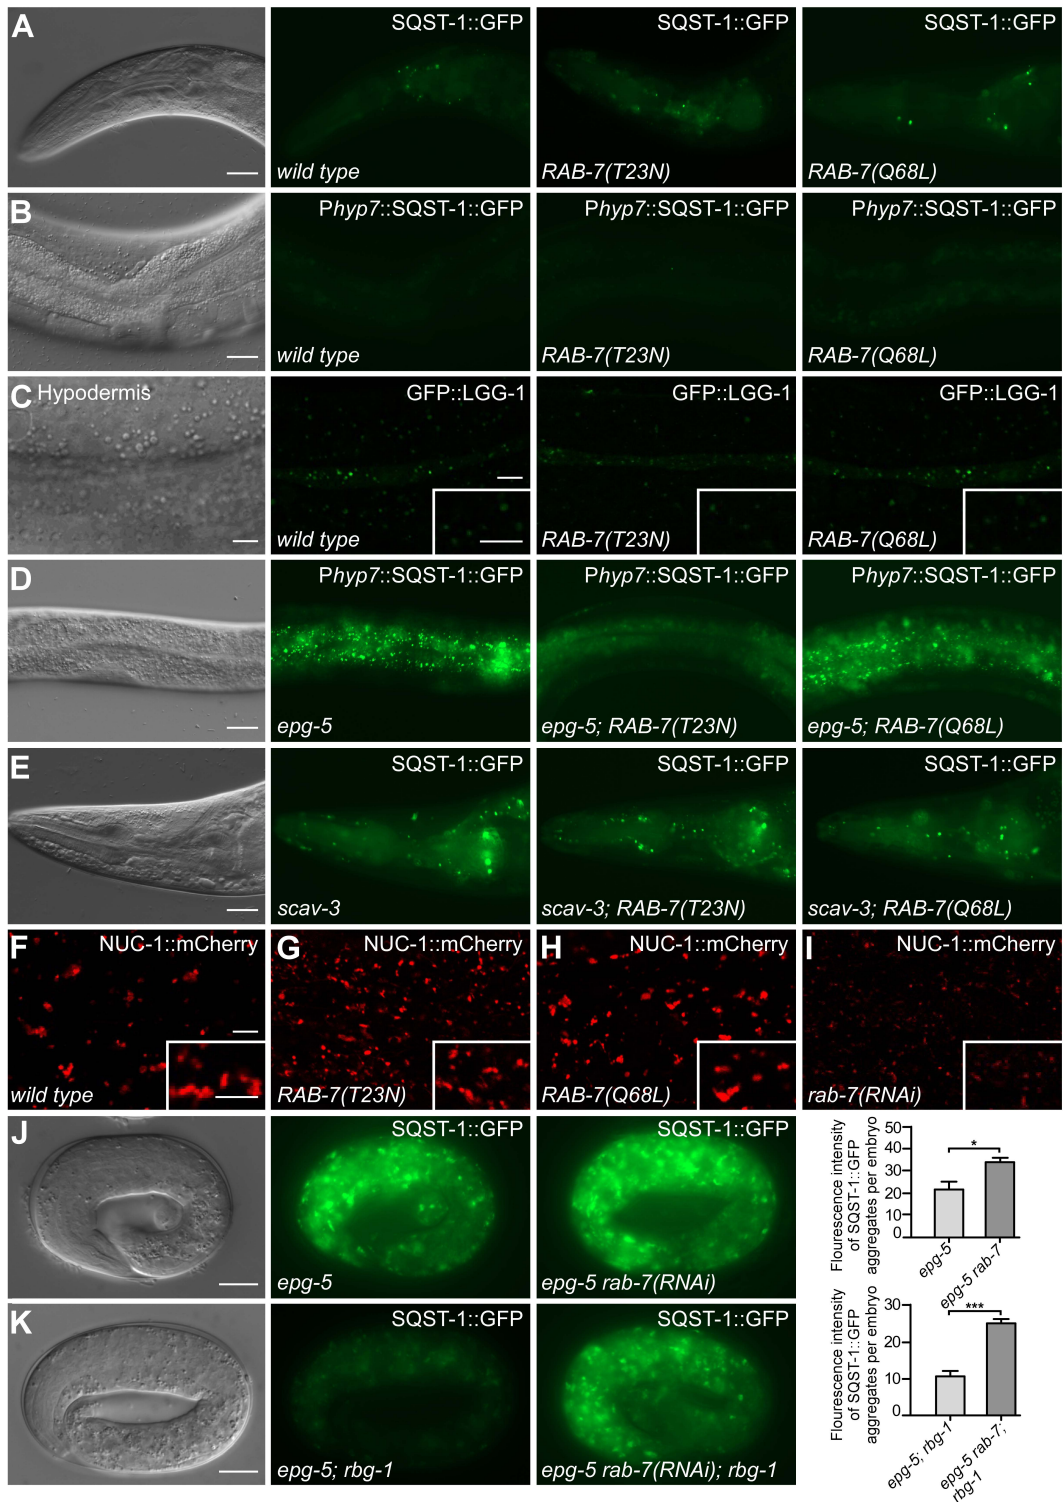

Figure S4

**Figure S4. Expression of RAB-7(T23N), but not RAB-7(Q68L) or *rab-7(RNAi)*, mimics the effect of loss of function of *rbg-1* on autophagy.**

(A-C) In animals expressing RAB-7(T23N) and RAB-7(Q68L), SQST-1::GFP (A, B) and GFP::LGG-1(C) show no evident accumulation. Scale bar: 20  $\mu\text{m}$  (A, B); 5  $\mu\text{m}$  (C).

(D) The accumulation of SQST-1::GFP aggregates in *epg-5* hypodermis is suppressed by expression of RAB-7(T23N), but not by RAB-7(Q68L). Scale bar: 20  $\mu\text{m}$  (D).

(E) The accumulation of SQST-1::GFP aggregates in *scav-3* mutants is not suppressed by expression of RAB-7(T23N) and RAB-7(Q68L). Scale bar: 20  $\mu\text{m}$  (E).

(F-I) Compared to wild-type animals, the NUC-1::mCherry-labeled lysosomes are smaller in animals expressing RAB-7(T23N) (G), but show no change in RAB-7(Q68L)-expressing animals (H). NUC-1::mCherry labels many tiny dots in *rab-7(RNAi)* animals (I). Scale bar: 5  $\mu\text{m}$  (F-I).

(J,K) *RNAi* inactivation of *rab-7* enhances the accumulation of SQST-1::GFP aggregates in *epg-5* (J) and *epg-5; rbg-1* (K) embryos. Quantification of the fluorescence intensity of SQST-1::GFP in various genetic backgrounds is shown as mean  $\pm$  S.E.M. (n=5). \* $p < 0.05$ , \*\*\* $p < 0.001$ . Scale bar: 10  $\mu\text{m}$  (J,K).

**Table S1.** *C. elegans* strains used in this work.

| Strain  | Genotype                                                                                             | Source                    |
|---------|------------------------------------------------------------------------------------------------------|---------------------------|
| FX03425 | <i>epg-5(tm3425)</i>                                                                                 | From Dr. Shohei Mitani    |
| HZ3195  | <i>rbg-1(bp1150)</i>                                                                                 | This work                 |
| HZ3524  | <i>epg-5(tm3425); rbg-1(bp1150)</i>                                                                  | This work                 |
| HZ2043  | <i>bpls267(P<sub>hyp-7</sub>SQST-1::GFP, unc-76)</i>                                                 | From Dr. Hong Zhang's lab |
| HZ4661  | <i>epg-5(tm3425); bpls267(P<sub>hyp-7</sub>SQST-1::GFP, unc-76)</i>                                  | This work                 |
| HZ3703  | <i>epg-5(tm3425); rbg-1(bp1150);<br/>bpls267(P<sub>hyp-7</sub>SQST-1::GFP, unc-76)</i>               | This work                 |
| HZ1528  | <i>bpls151(P<sub>sqst-1</sub>SQST-1::GFP, unc-76)</i>                                                | From Dr. Hong Zhang's lab |
| HZ3716  | <i>epg-5(tm3425); bpls151(P<sub>sqst-1</sub>SQST-1::GFP, unc-76)</i>                                 | This work                 |
| HZ3516  | <i>epg-5(tm3425); rbg-1(bp1150);<br/>bpls151(P<sub>sqst-1</sub>SQST-1::GFP, unc-76)</i>              | This work                 |
| HZ2038  | <i>bpls262(P<sub>ges-1</sub>SQST-1::GFP, unc-76)</i>                                                 | From Dr. Hong Zhang's lab |
| HZ3701  | <i>epg-5(tm3425); bpls262(P<sub>ges-1</sub>SQST-1::GFP, unc-76)</i>                                  | This work                 |
| HZ3479  | <i>epg-5(tm3425); rbg-1(bp1150);<br/>bpls262(P<sub>ges-1</sub>SQST-1::GFP, unc-76)</i>               | This work                 |
| HZ4249  | <i>bpls193(P<sub>hjh-1</sub>SQST-1::GFP, unc-76)</i>                                                 | From Dr. Hong Zhang's lab |
| HZ3728  | <i>epg-5(tm3425); bpls193(P<sub>hjh-1</sub>SQST-1::GFP, unc-76)</i>                                  | This work                 |
| HZ3713  | <i>epg-5(tm3425); rbg-1(bp1150);<br/>bpls193(P<sub>hjh-1</sub>SQST-1::GFP, unc-76)</i>               | This work                 |
| HZ2780  | <i>bpls328(P<sub>unc-119</sub>SQST-1::GFP, Pord-1::RFP)</i>                                          | From Dr. Hong Zhang's lab |
| HZ4651  | <i>epg-5(tm3425); bpls328(P<sub>unc-119</sub>SQST-1::GFP, Pord-1::RFP)</i>                           | This work                 |
| HZ4653  | <i>epg-5(tm3425); rbg-1(bp1150);<br/>bpls328(P<sub>unc-119</sub>SQST-1::GFP, Pord-1::RFP)</i>        | This work                 |
| DA2123  | <i>adls2122(P<sub>lgg-1</sub>GFP::LGG-1, rol-6(su1006))</i>                                          | CGC                       |
| HZ3486  | <i>epg-5(tm3425); adls2122(P<sub>lgg-1</sub>GFP::LGG-1, rol-6(su1006))</i>                           | This work                 |
| HZ3519  | <i>rbg-1(bp1150); adls2122(P<sub>lgg-1</sub>GFP::LGG-1, rol-6(su1006))</i>                           | This work                 |
| HZ3488  | <i>epg-5(tm3425); rbg-1(bp1150);<br/>adls2122(P<sub>lgg-1</sub>GFP::LGG-1, rol-6(su1006))</i>        | This work                 |
| HZ4660  | <i>rab-3(bp1558) epg-5(tm3425);<br/>bpls267(P<sub>hyp-7</sub>SQST-1::GFP, unc-76)</i>                | This work                 |
| HZ3193  | <i>rab-3(bp1558) epg-5(tm3425);<br/>rbg-1(bp1150); bpls267(P<sub>hyp-7</sub>SQST-1::GFP, unc-76)</i> | This work                 |
| HZ3730  | <i>bec-1(bp613); bpls151(P<sub>sqst-1</sub>SQST-1::GFP, unc-76)</i>                                  | From Dr. Hong Zhang's lab |
| HZ3731  | <i>bec-1(bp613); rbg-1(bp1150);<br/>bpls151(P<sub>sqst-1</sub>SQST-1::GFP, unc-76)</i>               | This work                 |
| HZ3708  | <i>cpl-1(qx304); bpls151(P<sub>sqst-1</sub>SQST-1::GFP, unc-76)</i>                                  | This work                 |
| HZ3742  | <i>cpl-1(qx304); rbg-1(bp1150);<br/>bpls151(P<sub>sqst-1</sub>SQST-1::GFP, unc-76)</i>               | This work                 |
| HZ3704  | <i>epg-7(tm2508); bpls267(P<sub>hyp-7</sub>SQST-1::GFP, unc-76)</i>                                  | From Dr. Hong Zhang's lab |
| HZ3518  | <i>epg-7(tm2508); rbg-1(bp1150);<br/>bpls267(P<sub>hyp-7</sub>SQST-1::GFP, unc-76)</i>               | This work                 |
| HZ946   | <i>rpl-43(bp399); bpls151(P<sub>sqst-1</sub>SQST-1::GFP, unc-76)</i>                                 | From Dr. Hong Zhang's lab |

|         |                                                                                                                                          |                              |
|---------|------------------------------------------------------------------------------------------------------------------------------------------|------------------------------|
| XW8738  | <i>scav-3(qx193); bpls151(P<sub>sqst-1</sub>SQST-1::GFP, unc-76)</i>                                                                     | From Dr. Xiaochen Wang's lab |
| XW5399  | <i>qxIs257(P<sub>ced-1</sub>NUC-1::mCherry, unc-76)</i>                                                                                  | From Dr. Xiaochen Wang's lab |
| HZ3475  | <i>epg-5(tm3425); qxIs257(P<sub>ced-1</sub>NUC-1::mCherry, unc-76)</i>                                                                   | This work                    |
| HZ4654  | <i>rbg-1(bp1150); qxIs257(P<sub>ced-1</sub>NUC-1::mCherry, unc-76)</i>                                                                   | This work                    |
| HZ3480  | <i>epg-5(tm3425); rbg-1(bp1150);<br/>qxIs257(P<sub>ced-1</sub>NUC-1::mCherry, unc-76)</i>                                                | This work                    |
| HZ2215  | <i>qxIs257(P<sub>ced-1</sub>NUC-1::mCherry, unc-76); qxIs66(P<sub>ced-1</sub>GFP::RAB-7, unc-76)</i>                                     | This work                    |
| XW19131 | <i>qxIs750(P<sub>hsp</sub>NUC-1::pHTomato, Pord-1::GFP)</i>                                                                              | From Dr. Xiaochen Wang's lab |
| HZ4655  | <i>epg-5(tm3425); qxIs750(P<sub>hsp</sub>NUC-1::pHTomato, Pord-1::GFP)</i>                                                               | This work                    |
| HZ4656  | <i>rbg-1(bp1150); qxIs750(P<sub>hsp</sub>NUC-1::pHTomato, Pord-1::GFP)</i>                                                               | This work                    |
| HZ4657  | <i>epg-5(tm3425); rbg-1(bp1150);<br/>qxIs750(P<sub>hsp</sub>NUC-1::pHTomato, Pord-1::GFP)</i>                                            | This work                    |
| XW1235  | <i>qxIs66(P<sub>ced-1</sub>GFP::RAB-7, unc-76)</i>                                                                                       | From Dr. Xiaochen Wang's lab |
| HZ3483  | <i>epg-5(tm3425); qxIs66(P<sub>ced-1</sub>GFP::RAB-7, unc-76)</i>                                                                        | This work                    |
| HZ3484  | <i>rbg-1(bp1150); qxIs66(P<sub>ced-1</sub>GFP::RAB-7, unc-76)</i>                                                                        | This work                    |
| HZ3485  | <i>epg-5(tm3425); rbg-1(bp1150);<br/>qxIs66(P<sub>ced-1</sub>GFP::RAB-7, unc-76)</i>                                                     | This work                    |
| XW13734 | <i>qxIs612(P<sub>hsp</sub>NUC-1::sfGFP::mCherry, unc-76)</i>                                                                             | From Dr. Xiaochen Wang's lab |
| HZ3709  | <i>epg-5(tm3425); qxIs612(P<sub>hsp</sub>NUC-1::sfGFP::mCherry, unc-76)</i>                                                              | This work                    |
| HZ3732  | <i>rbg-1(bp1150); qxIs612(P<sub>hsp</sub>NUC-1::sfGFP::mCherry, unc-76)</i>                                                              | This work                    |
| HZ3743  | <i>epg-5(tm3425); rbg-1(bp1150);<br/>qxIs612(P<sub>hsp</sub>NUC-1::sfGFP::mCherry, unc-76)</i>                                           | This work                    |
| XW17602 | <i>qxIs686(P<sub>hyp-7</sub>GFP::RAB-10, unc-76)</i>                                                                                     | From Dr. Xiaochen Wang's lab |
| HZ4493  | <i>qxIs257(P<sub>ced-1</sub>NUC-1::mCherry, unc-76); qxIs686(P<sub>hyp-7</sub>GFP::RAB-10, unc-76)</i>                                   | This work                    |
| HZ4616  | <i>epg-5(tm3425); qxIs257(P<sub>ced-1</sub>NUC-1::mCherry, unc-76);<br/>qxIs686(P<sub>hyp-7</sub>GFP::RAB-10, unc-76)</i>                | This work                    |
| HZ4659  | <i>rbg-1(bp1150); qxIs257(P<sub>ced-1</sub>NUC-1::mCherry, unc-76);<br/>qxIs686(P<sub>hyp-7</sub>GFP::RAB-10, unc-76)</i>                | This work                    |
| HZ4617  | <i>epg-5(tm3425); rbg-1(bp1150); qxIs257(P<sub>ced-1</sub>NUC-1::mCherry, unc-76);<br/>qxIs686(P<sub>hyp-7</sub>GFP::RAB-10, unc-76)</i> | This work                    |
| HZ4494  | <i>bpEx342(P<sub>hyp-7</sub>BFP::LGG-1, Pmyo-2::GFP)</i>                                                                                 | This work                    |
| HZ4491  | <i>bpls395(P<sub>nfy-1</sub>RAB-7(T23N), rol-6(su1006))</i>                                                                              | This work                    |
